# Supplementary material for: Two porous three-dimensional (3D) metal–organic frameworks based on diverse metal clusters: selective sensing of Fe3+ and Cr2O72−
Source: Royal Society of Chemistry journal article supplement (doi:10.1039/d1nj06217d), 2022-01-01
Supplement: d1nj06217d1.pdf [file d1nj06217d1.pdf]

## Supporting Information

### **Two porous three-dimensional (3D) metal-organic frameworks based on diverse metal clusters: selective sensing of Fe<sup>3+</sup> and Cr<sub>2</sub>O<sub>7</sub><sup>2-</sup>**

Yang-Tian Yan <sup>a,\*</sup>, Yun-Long Wu <sup>a</sup>, Li-Na Zheng <sup>a</sup>, Wei Cai <sup>a</sup>, Peng-Fei Tang <sup>a</sup>, Wei-Ping Wu <sup>c</sup>, Wen-Yan Zhang <sup>b</sup>, and Yao-Yu Wang <sup>b</sup>

<sup>a</sup> School of Materials Science & Engineering, Xi'an Polytechnic University, Xi'an 710048, P. R. China.

<sup>b</sup> Key Laboratory of Synthetic and Natural Functional Molecule of Ministry of Education, Shaanxi Key Laboratory of Physico-Inorganic Chemistry, College of Chemistry & Materials Science, Northwest University, Xi'an 710127, P. R. China.

<sup>c</sup> College of Chemistry and Environmental Engineering and Key Laboratory of Green Chemistry of Sichuan Institutes of Higher Education, Sichuan University of Science and Engineering, Zigong 643000, P. R. China.

**Table S1** Crystallographic data and Structural Refinement Parameters of **1** and **2**.

| MOFs                                                           | <b>1</b>                                                                       | <b>2</b>                                                                       |
|----------------------------------------------------------------|--------------------------------------------------------------------------------|--------------------------------------------------------------------------------|
| formula                                                        | C <sub>59</sub> H <sub>65</sub> Zn <sub>5</sub> N <sub>5</sub> O <sub>29</sub> | C <sub>66</sub> H <sub>88</sub> Cu <sub>3</sub> N <sub>8</sub> O <sub>29</sub> |
| <i>Mr</i>                                                      | 1635.01                                                                        | 1648.06                                                                        |
| crystal system                                                 | triclinic                                                                      | orthorhombic                                                                   |
| space group                                                    | <i>P</i> -1                                                                    | <i>Imma</i>                                                                    |
| <i>a</i> (Å)                                                   | 12.153(2)                                                                      | 30.462(4)                                                                      |
| <i>b</i> (Å)                                                   | 12.643(3)                                                                      | 28.777(4)                                                                      |
| <i>c</i> (Å)                                                   | 12.690(3)                                                                      | 12.1091(17)                                                                    |
| $\alpha$ (°)                                                   | 84.243(3)                                                                      | 90                                                                             |
| $\beta$ (°)                                                    | 85.337(3)                                                                      | 90                                                                             |
| $\gamma$ (°)                                                   | 78.012(3)                                                                      | 90                                                                             |
| <i>V</i> (Å <sup>3</sup> )                                     | 1894.1(7)                                                                      | 10615(3)                                                                       |
| <i>Z</i>                                                       | 1                                                                              | 4                                                                              |
| <i>D</i> <sub>calc</sub> (g cm <sup>-3</sup> )                 | 1.433                                                                          | 1.031                                                                          |
| <i>F</i> (000)                                                 | 836.0                                                                          | 3436.0                                                                         |
| GOF on <i>F</i> <sup>2</sup>                                   | 1.087                                                                          | 0.945                                                                          |
| <i>R</i> <sub>1</sub> <sup>a</sup> [ <i>I</i> >2σ( <i>I</i> )] | 0.0549                                                                         | 0.0482                                                                         |
| <i>wR</i> <sub>2</sub> <sup>b</sup> (all data)                 | 0.1913                                                                         | 0.1234                                                                         |

$$^a R_1 = \frac{\sum ||F_o| - |F_c||}{\sum |F_o|}, \quad wR_2^b = \left[ \frac{\sum w(F_o^2 - F_c^2)^2}{\sum w(F_o^2)^2} \right]^{1/2}$$

**Table S2. Selected Bond Length (Å) and Angles (°) for 1 and 2**

| <b>Complex 1</b>                                                                                                        |            |                     |            |
|-------------------------------------------------------------------------------------------------------------------------|------------|---------------------|------------|
| O(1)-Zn(2)#1                                                                                                            | 1.909(4)   | Zn(1)-O(3)#2        | 2.060(3)   |
| Zn(1)-O(3)                                                                                                              | 2.060(3)   | Zn(1)-O(6)#2        | 2.181(4)   |
| Zn(1)-O(6)                                                                                                              | 2.181(4)   | O(9)-Zn(3)#6        | 1.931(4)   |
| Zn(1)-O(8)#2                                                                                                            | 2.041(4)   | O(10)-Zn(2)#4       | 2.001(4)   |
| Zn(1)-O(8)                                                                                                              | 2.041(4)   | O(11)-Zn(3)#4       | 1.953(4)   |
| Zn(2)-O(1)#3                                                                                                            | 1.909(4)   | O(3)-Zn(1)-O(3)#2   | 180.0      |
| Zn(2)-O(3)                                                                                                              | 1.974(4)   | O(3)-Zn(1)-O(6)     | 96.03(15)  |
| Zn(2)-O(4)                                                                                                              | 1.966(4)   | O(3)-Zn(1)-O(6)#2   | 83.97(15)  |
| Zn(2)-O(10)#4                                                                                                           | 2.001(4)   | O(3)#2-Zn(1)-O(6)   | 83.97(15)  |
| Zn(3)-O(3)                                                                                                              | 1.973(4)   | O(3)#2-Zn(1)-O(6)#2 | 96.03(15)  |
| Zn(3)-O(7)                                                                                                              | 1.929(4)   | O(6)-Zn(1)-O(6)#2   | 180.0(2)   |
| Zn(3)-O(9)#5                                                                                                            | 1.931(4)   | O(1)#3-Zn(2)-O(3)   | 109.31(16) |
| Zn(3)-O(11)#4                                                                                                           | 1.953(4)   | O(1)#3-Zn(2)-O(4)   | 117.78(18) |
| O(8)-Zn(1)-O(3)#2                                                                                                       | 88.97(17)  | O(11)#4-Zn(3)-O(3)  | 105.83(17) |
| O(8)-Zn(1)-O(3)                                                                                                         | 91.03(17)  | O(3)-Zn(2)-O(10)#4  | 108.39(16) |
| O(8)#2-Zn(1)-O(3)#2                                                                                                     | 91.03(17)  | O(4)-Zn(2)-O(3)     | 115.58(17) |
| O(8)#2-Zn(1)-O(3)                                                                                                       | 88.97(17)  | O(4)-Zn(2)-O(10)#4  | 99.6(2)    |
| O(8)-Zn(1)-O(6)                                                                                                         | 89.80(16)  | O(7)-Zn(3)-O(3)     | 110.82(17) |
| O(8)-Zn(1)-O(6)#2                                                                                                       | 90.20(16)  | O(7)-Zn(3)-O(9)#5   | 121.5(2)   |
| O(8)#2-Zn(1)-O(6)                                                                                                       | 90.20(16)  | O(7)-Zn(3)-O(11)#4  | 103.5(2)   |
| O(8)-Zn(1)-O(8)#2                                                                                                       | 180.0      | O(9)#5-Zn(3)-O(3)   | 106.20(18) |
| Symmetrical codes: #1 x, y+1, z; #2 -x, -y+1, -z+1; #3 x, y-1, z; #4 -x+1, -y+1, -z+1; #5 x, y, z-1; #6 x, y, z+1 for 1 |            |                     |            |
| <b>Complex 2</b>                                                                                                        |            |                     |            |
| Cu(1)-O(1)                                                                                                              | 1.9447(17) | Cu(2)-O(3)          | 1.9744(18) |
| Cu(1)-O(1)#1                                                                                                            | 1.9448(17) | Cu(2)-O(4)#4        | 1.9716(19) |
| Cu(1)-O(1)#2                                                                                                            | 1.9448(17) | Cu(2)-O(4)#6        | 1.9716(19) |
| Cu(1)-O(1)#3                                                                                                            | 1.9448(17) | Cu(2)-O(5)          | 2.155(4)   |
| Cu(2)-O(3)#5                                                                                                            | 1.9743(18) | O(4)-Cu(2)#4        | 1.9716(19) |
| O(1)-Cu(1)-O(1)#2                                                                                                       | 180.0      | O(3)#5-Cu(2)-O(3)   | 88.98(12)  |
| O(1)#2-Cu(1)-O(1)#1                                                                                                     | 88.52(10)  | O(3)-Cu(2)-O(5)     | 95.48(11)  |
| O(1)#2-Cu(1)-O(1)#3                                                                                                     | 91.48(10)  | O(3)#5-Cu(2)-O(5)   | 95.48(11)  |
| O(1)#3-Cu(1)-O(1)#1                                                                                                     | 180.00(8)  | O(4)#4-Cu(2)-O(3)#5 | 90.05(9)   |
| O(1)-Cu(1)-O(1)#1                                                                                                       | 91.48(10)  | O(4)#6-Cu(2)-O(3)   | 90.05(9)   |

|                     |           |                     |           |
|---------------------|-----------|---------------------|-----------|
| O(1)-Cu(1)-O(1)#3   | 88.52(10) | O(4)#6-Cu(2)-O(3)#5 | 168.41(9) |
| O(4)#4-Cu(2)-O(3)   | 168.41(9) | O(4)#6-Cu(2)-O(5)   | 96.11(10) |
| O(4)#4-Cu(2)-O(4)#6 | 88.58(12) | O(4)#4-Cu(2)-O(5)   | 96.11(10) |

Symmetrical codes: #1  $-x+1/2, y+0, -z+3/2$ ; #2  $-x+1/2, -y-1/2, -z+3/2$ ; #3  $x, -y-1/2, z$ ; #4  $-x+1, -y, -z+1$ ; #5  $-x+1, y, z$ ; #6  $x, -y, -z+1$  for **2**

**Fig. S1.** The structure of **1** in ellipsoid model (a) and coordination configuration of H<sub>5</sub>L ligand in **1** (b).

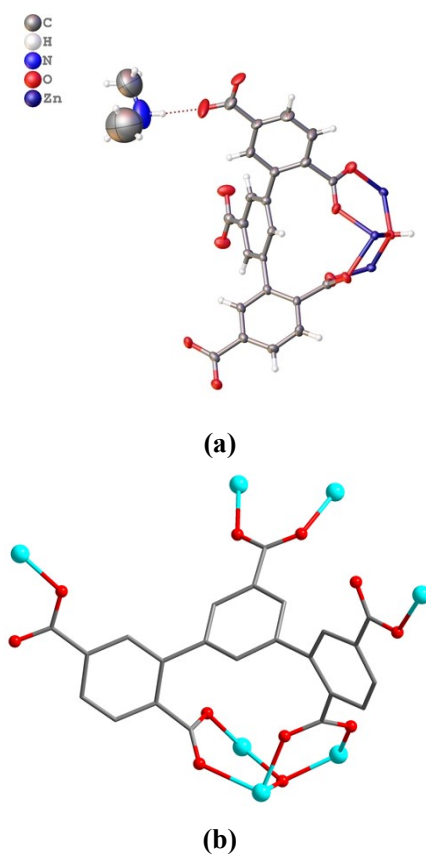

**Fig. S2.** 3D microporous framework of **1** and along  $a$ -axis. All the H atoms and guest molecules are omitted for clarity.

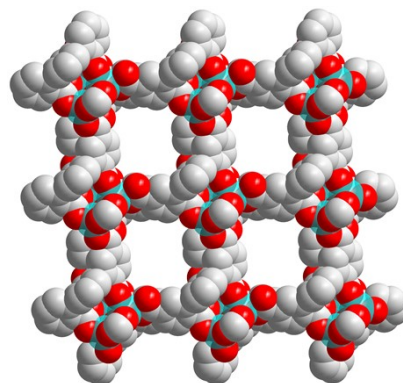

**Fig. S3.** The structure of **2** in ellipsoid model (a) and coordination configurations of H<sub>5</sub>L ligand in **2** (b).

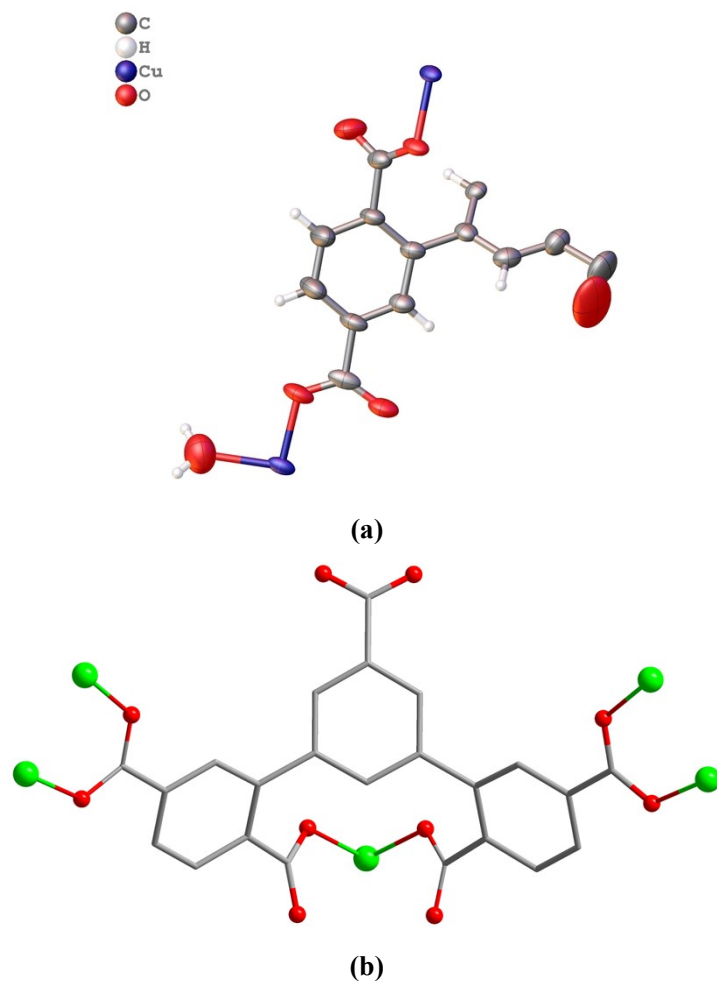

**Fig. S4.** 3D microporous framework of **2** and along *c*-axis. All the H atoms and guest molecules are omitted for clarity.

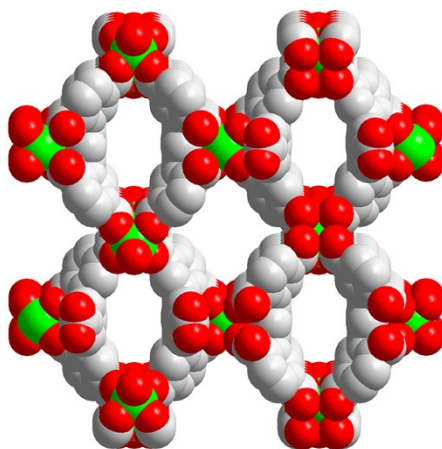

**Fig. S5.** PXRD patterns of **1-2** in (a-b) simulated from the X-ray single-crystal structure and experimental samples.

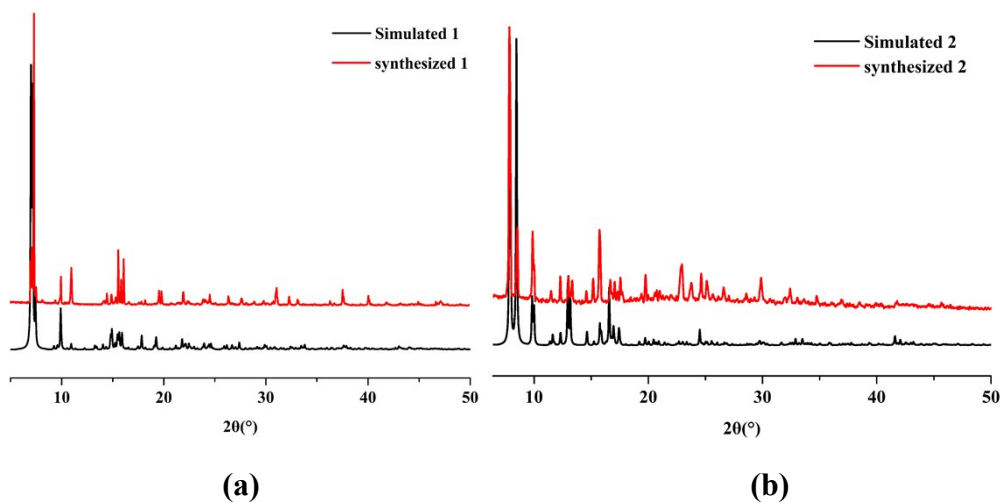

**Fig. S6.** TGA curves for **1** and **2**.

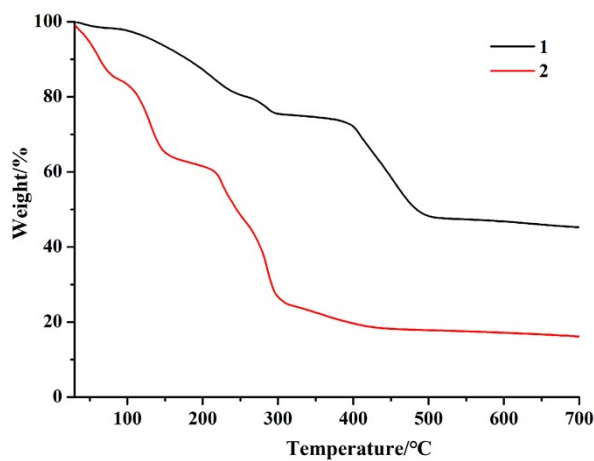

**Fig. S7.** Luminescence spectra of **1** and free ligand in the solid state at room temperature.

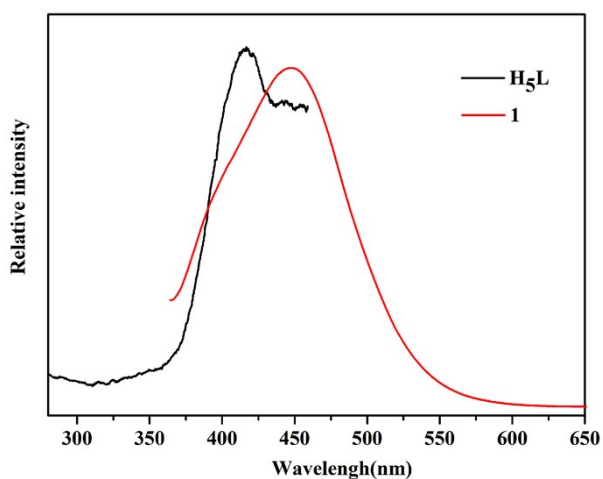

**Table S3.** Standard Deviation ( $\sigma$ ) calculation for the detection of  $\text{Fe}^{3+}$  for **1**.

| Test                            | fluorescence intensity (nm) |
|---------------------------------|-----------------------------|
| 1                               | 1191.774                    |
| 2                               | 1191.398                    |
| 3                               | 1190.986                    |
| 4                               | 1192.047                    |
| 5                               | 1191.549                    |
| average                         | 1191.551                    |
| standard deviation ( $\sigma$ ) | 0.399                       |

**Table S4.** A comparison of various fluorescent materials used for detecting  $\text{Fe}^{3+}$ .

| Fluorescent materials                                                                      | Ksv/M <sup>-1</sup> | detection limit/M      | Ref.      |
|--------------------------------------------------------------------------------------------|---------------------|------------------------|-----------|
| CUST-532                                                                                   | $1.01 \times 10^4$  | $1.12 \times 10^{-6}$  | 1         |
| $\{[\text{Cd}(\text{L})(\text{SDBA})(\text{H}_2\text{O})] \cdot 0.5\text{H}_2\text{O}\}_n$ | $3.59 \times 10^4$  | $7.14 \times 10^{-6}$  | 2         |
| $\{[\text{Zn}(\mu\text{-HCIP})(\mu\text{-pbix})] \cdot 2\text{H}_2\text{O}\}_n$            | $6.87 \times 10^3$  | $3.72 \times 10^{-6}$  | 3         |
| BUT-15                                                                                     | $1.66 \times 10^4$  | $3.0 \times 10^{-7}$   | 4         |
| <b>Complex 1</b>                                                                           | $9.799 \times 10^4$ | $1.2 \times 10^{-5}$   | This work |
| $\text{Eu}(\text{acac})_3 \cdot \text{Zn}(\text{C}_{15}\text{H}_{12}\text{NO}_2)_2$        | -                   | $5 \times 10^{-3}$     | 5         |
| $\text{Eu}(\text{C}_{22}\text{H}_{14}\text{O}_2)_3$                                        | -                   | $10^{-4}$              | 6         |
| $\{[\text{Zn}(\text{L})(\text{dcdps})]\}_n$                                                | $7.004 \times 10^3$ | $6.21 \times 10^{-5}$  | 7         |
| $\{\text{Zn}(\text{L})(\text{bdc})\}_n$                                                    | $9.066 \times 10^3$ | $4.45 \times 10^{-5}$  | 7         |
| $\{[\text{Cd}(\text{L})(\text{oba})] \cdot 0.5\text{DMF}\}_n$                              | $4.984 \times 10^3$ | $11.52 \times 10^{-5}$ | 7         |
| $\{[\text{Cd}(\text{L})(\text{bdc}) \cdot 2\text{H}_2\text{O}] \cdot 2\text{DMF}\}_n$      | $6.387 \times 10^3$ | $6.36 \times 10^{-5}$  | 7         |

**Fig. S8.** Multiple cycles for the fluorescence quenching of **1** by  $\text{Fe}^{3+}$  and recovery after washing by  $\text{H}_2\text{O}$  for several times.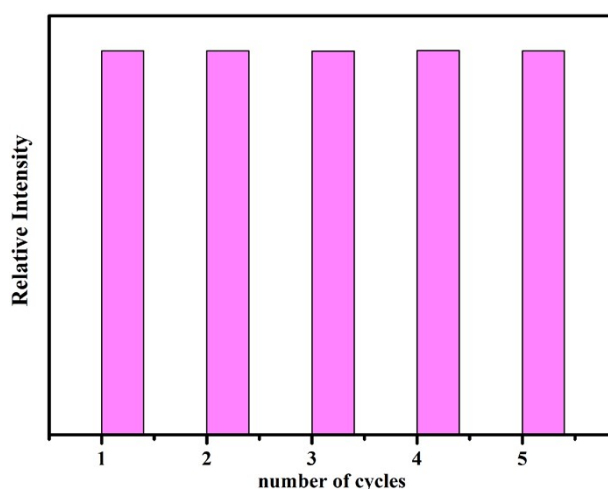

**Fig. S9.** PXRD patterns of **1** treated by different  $M(NO_3)_X$  aqueous solutions. It indicated that **1** retains its framework after immersed in aqueous solution containing different cations.

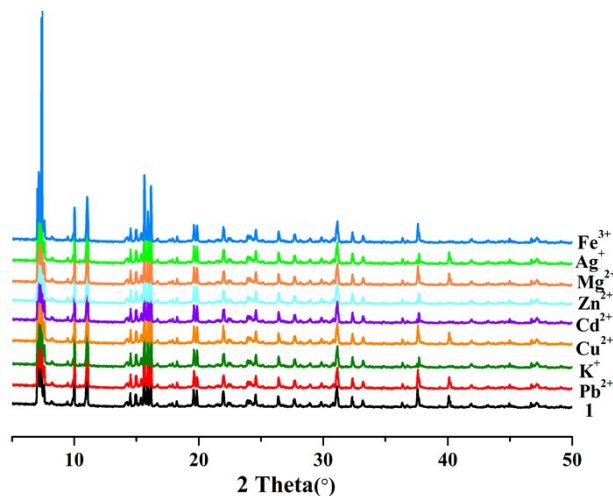

**Fig. S10.** UV-Vis adsorption spectra of  $M(NO_3)_X$  aqueous solutions, the excitation spectrum and the emission spectrum of **1**.

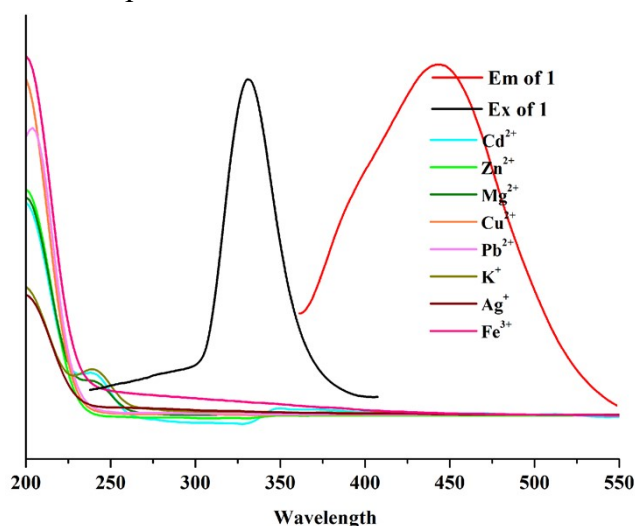

**Fig. S11.** XPS spectra of O 1s for **1** and  $Fe^{3+}$ -**1**.

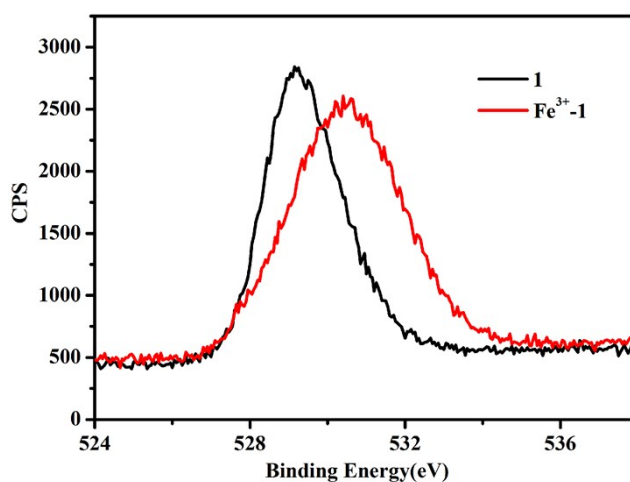

(a)



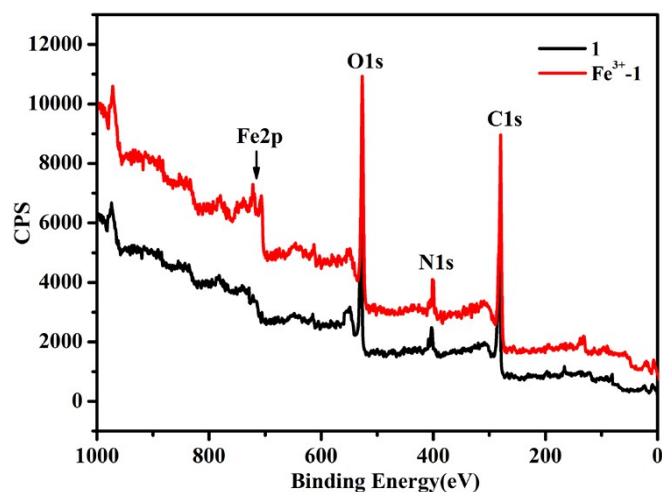

(b)

**Table S5.** Standard Deviation ( $\sigma$ ) calculation for the detection of  $\text{Cr}_2\text{O}_7^{2-}$  for **1**.

| Test                            | fluorescence intensity (nm) |
|---------------------------------|-----------------------------|
| 1                               | 1286.365                    |
| 2                               | 1285.998                    |
| 3                               | 1287.016                    |
| 4                               | 1285.899                    |
| 5                               | 1286.056                    |
| average                         | 1286.267                    |
| standard deviation ( $\sigma$ ) | 0.906                       |

**Table S6.** A comparison of various fluorescent materials used for detecting  $\text{Cr}_2\text{O}_7^{2-}$ .

| Fluorescent materials                                                                                          | $K_{sv}/M^{-1}$     | detection limit/M     | Ref.      |
|----------------------------------------------------------------------------------------------------------------|---------------------|-----------------------|-----------|
| $\{[\text{Zn}(\text{L})(\text{dcdps})]\}_n$                                                                    | $4.456 \times 10^4$ | $1.03 \times 10^{-5}$ | 7         |
| $\{\text{Zn}(\text{L})(\text{bdc})\}_n$                                                                        | $7.716 \times 10^4$ | $5.55 \times 10^{-6}$ | 7         |
| $\{[\text{Cd}(\text{L})(\text{oba})] \cdot 0.5\text{DMF}\}_n$                                                  | $6.145 \times 10^4$ | $7.36 \times 10^{-6}$ | 7         |
| $\{[\text{Cd}(\text{L})(\text{bdc}) \cdot 2\text{H}_2\text{O}] \cdot 2\text{DMF}\}_n$                          | $4.248 \times 10^4$ | $1.05 \times 10^{-5}$ | 7         |
| <b>Complex 1</b>                                                                                               | $1.455 \times 10^4$ | $1.86 \times 10^{-4}$ | This work |
| $\{[\text{Zn}_2(\text{Hbtc})_2(\text{BTD-bpy})(\text{MeOH})_2] \cdot \text{MeOH}\}_n$                          | $6.12 \times 10^3$  | $2.38 \times 10^{-3}$ | 8         |
| $\{[\text{Cd}_3(\text{HL})_2(\text{H}_2\text{O})_3] \cdot 3\text{H}_2\text{O} \cdot 2\text{CH}_3\text{CN}\}_n$ | $6.99 \times 10^3$  | $1.17 \times 10^{-4}$ | 9         |
| $\{[\text{Zn}_2(1,4\text{-ndc})_2(\text{BTD-bpy})] \cdot 0.5\text{MeOH} \cdot \text{H}_2\text{O}\}_n$          | $8.94 \times 10^3$  | $0.75 \times 10^{-3}$ | 8         |
| $[\text{Zn}_2(\text{tpeb})(\text{bpdc})_2]$                                                                    | $1.12 \times 10^4$  | $1.04 \times 10^{-3}$ | 10        |
| $[\text{Zn}(\text{L})_2] \cdot 2\text{DMF}$                                                                    | $1.25 \times 10^4$  | $1.45 \times 10^{-3}$ | 11        |
| $[\text{Zn}(\text{pdca})(\text{bbibp})_{0.5}]_n$                                                               | $8.05 \times 10^3$  | $3.7 \times 10^{-6}$  | 12        |

**Fig. S12.** Multiple cycles for the fluorescence quenching of **1** by  $\text{Cr}_2\text{O}_7^{2-}$  and recovery after washing by  $\text{H}_2\text{O}$  for several times.

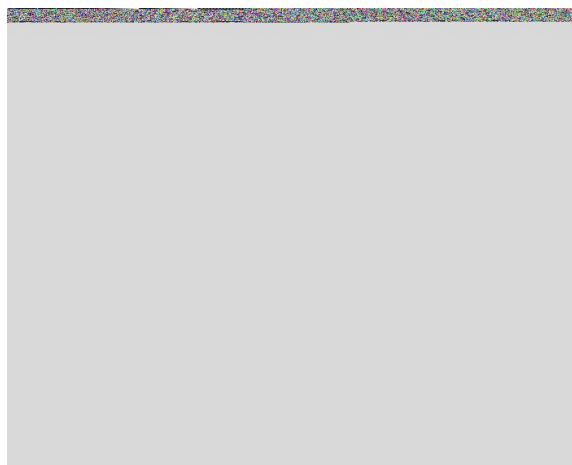

**Fig. S13.** PXRD patterns of **1** treated by different  $\text{K}_x(\text{anion})$  aqueous solutions. It indicated that **1** retains its framework after immersed in aqueous solution containing different anions.

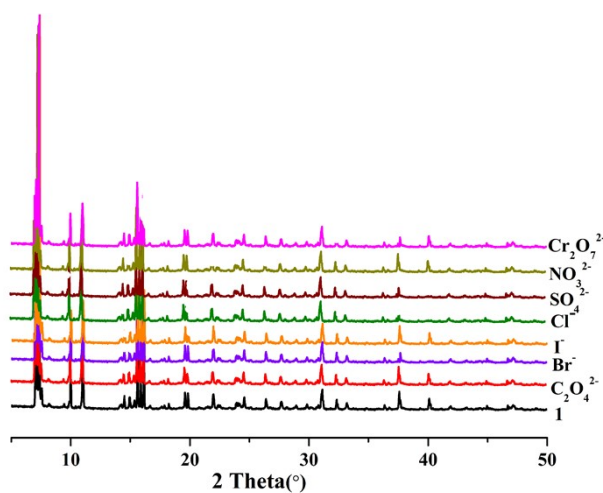

**Fig. S14.** UV-Vis adsorption spectra of  $\text{K}(\text{anion})_x$  aqueous solutions and the excitation spectrum and the emission spectrum of **1**.

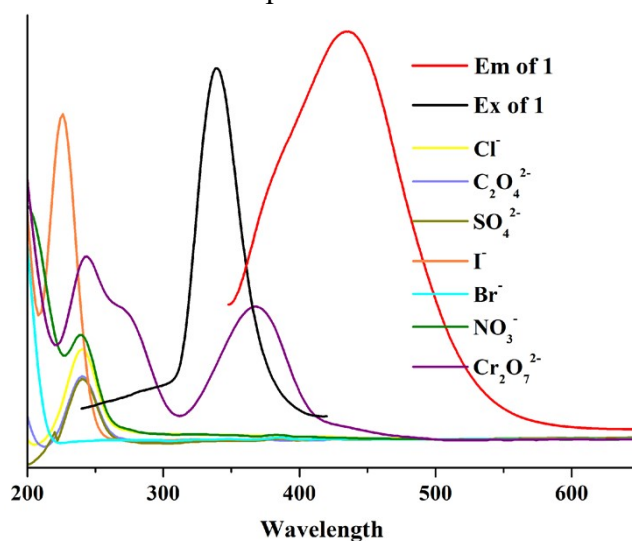

**Fig. S15.** IR spectra of the as-synthesized **1-2** in (a-b).

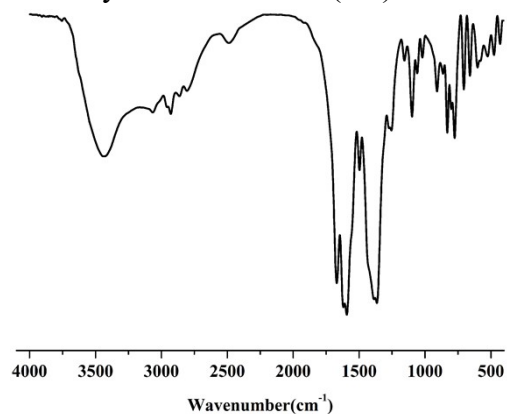

(a)

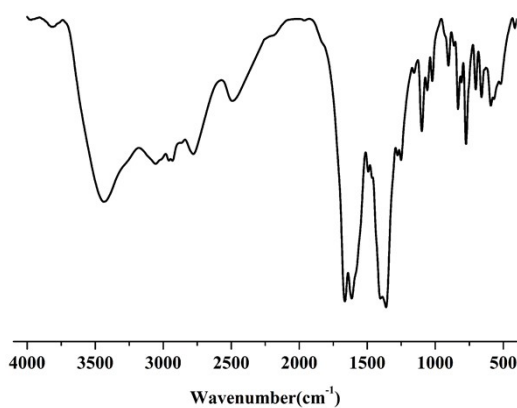

(b)

## References

1. M.-Y. Fan, B. Sun, X. Li, Q. Pan, J. Sun, P. Ma, Zhong. Su, *Inorg. Chem.*, 2021, **60**, 9148–9156
2. S.-G. Chen, Z.-Z. Shi, L. Qin, H.-L. Jia, H.-G. Zheng, *Cryst. Growth Des.*, 2017, **17**, 67–72.
3. M. Arici, *Cryst. Growth Des.*, 2017, **17**, 5499–5505.
4. B. Wang, Q. Yang, C. Guo, Y.-X. Sun, L.-H. Xie, J.-R. Li, *ACS Appl. Mater. Interfaces*, 2017, **9**, 10286–10295.
5. Q. Tang, S.-X. Liu, Y.-W. Liu, J. Miao, S.-J. Li, L. Zhang, Z. Shi, Z.-P. Zheng, *Inorg. Chem.*, 2013, **52**, 2799–2801.
6. G.-G. Hou, Y. Liu, Q.-K. Liu, J.-P. Ma, Y.-B. Dong, *Chem. Commun.*, 2011, **47**, 10731–10733.
7. F.-Y. Ge, G.-H. Sun, L. Meng, S.-S. Ren, H.-G. Zheng, *Cryst. Growth Des.*, 2020, **20**, 1898–1904.

8. Q. J. Jiang, J. Y. Lin, Z. J. Hu, V. K. S. Hsiao, M. Y. Chung and J. Y. Wu, *Cryst. Growth Des.*, 2021, **21**, 2056-2067.
9. W. Q. Tong, W. N. Liu, J. G. Cheng, P. F. Zhang, G. P. Li, L. Hou and Y. Y. Wang, *Dalton Trans.*, 2018, **47**, 9466-9473.
10. B. B. Rath and J. J. Vittal, *Inorg. Chem.*, 2020, **59**, 8818-8826.
11. B. Li, Q. Q. Yan and G. P. Yong, *J. Mater. Chem. C*, 2020, **8**, 11786-11795.
12. D. M. Zhang, C. G. Xu, Y. Z. Liu, C. B. Fan, B. Zhu and Y. H. Fan, *J. Solid State Chem.*, 2020, **290**, 121549.
